# Supplementary material for: In vitro and in vivo anti-inflammatory active copper(II)-lawsone complexes
Source: PubMed Central journal article supplement (PMC5526570; doi:10.1371/journal.pone.0181822), 2017-07-25
Supplement: pone.0181822.s001.pdf [file pone.0181822.s001.pdf]

## Synthesis and characterization of the reference complex $[\text{Cu}(\text{Law})_2(\text{H}_2\text{O})_2] \cdot 0.5\text{H}_2\text{O}$

The reference complex was prepared by the modification of published method of S. Salunke-Gawali *et al.*, in our case using a copper(II) acetate monohydrate as a starting material without a need to neutralize the resulting solution with sodium carbonate as originally used by S. Salunke-Gawali *et al* [13]. The crystalline product formed rapidly during the 1 hour of heating to 60°C while stirring in the 65% yield. The crystals of the compound were washed with ethanol (2 x 5 mL) and stored in desiccator over KOH for 2 days. The purity of the complex was checked by elemental analysis and characterized by infrared spectroscopy. The complex with the composition  $[\text{Cu}(\text{Law})_2(\text{H}_2\text{O})_2] \cdot 0.5\text{H}_2\text{O}$  was used as a reference for the further evaluation of complexes **1–7**.

$[\text{Cu}(\text{Law})_2(\text{H}_2\text{O})_2] \cdot 0.5\text{H}_2\text{O}$ : Yield: 65%, Anal. calc for  $\text{C}_{20}\text{H}_{15}\text{O}_{8.5}\text{Cu}$  (Mr= 454.89): C, 52.81; H, 3.32. Found: C, 53.10; H, 3.53. ESI+MS (methanol,  $m/z$ ): 197.0 (calc 197.0)  $[\text{Law}+\text{Na}]^+$ , 409.8 (calc. 409.9)  $[\text{Cu}(\text{Law})_2+\text{H}]^+$ , 431.8 (calc. 431.9)  $[\text{Cu}(\text{Law})_2+\text{Na}]^+$ , 447.8 (calc. 447.9)  $[\text{Cu}(\text{Law})_2+\text{K}]^+$ , 644.6 (calc. 644.9)  $[\text{Cu}_2(\text{Law})_3]^+$ , 840.5 (calc. 840.9)  $[\text{Cu}_2(\text{Law})_4+\text{Na}]^+$ . IR ( $\nu_{\text{ATR}}/\text{cm}^{-1}$ ): 3339m, 3033m, 1655m, 1625m, 1583s, 1561s, 1367m, 1336m, 1267s, 1250sh, 1214m, 1120m, 985s, 876m, 840m, 781m, 728s, 665m. UV-Vis (Nujol):  $\lambda_{\text{max}}$  (nm) 473sh, 727. UV-Vis (methanol):  $\lambda_{\text{max}}$  (nm) ( $\epsilon_{\text{max}} \times 10^3 \text{ M}^{-1} \text{ cm}^{-1}$ ) 280 (25.91), 460 (4.16).
