# Supplementary material for: In vitro and in vivo anti-inflammatory active copper(II)-lawsone complexes
Source: PubMed Central journal article supplement (PMC5526570; doi:10.1371/journal.pone.0181822), 2017-07-25
Supplement: pone.0181822.s014.pdf [file pone.0181822.s014.pdf]

**S1 Table. The interatomic parameters (in Å and °) of selected non-covalent interactions in the crystal structure of complex 2.**

| D-H...A                     | d(D-H) | d(H...A) | d(D...A) | <(DHA) |
|-----------------------------|--------|----------|----------|--------|
| N2-H2a...O3 <sup>i</sup>    | 0.88   | 1.90     | 2.778(4) | 174.3  |
| C12-H12a...O1 <sup>vi</sup> | 0.95   | 2.44     | 3.199(5) | 136.4  |
| C7-H7a...O2 <sup>vii</sup>  | 0.95   | 2.31     | 3.256(5) | 174.2  |

Symmetry transformations used to generate equivalent atoms:

(i)  $1/2-x, 1/2-y, 1/2+z$ ; (vi)  $x-1/2, 1/2-y, 1-z$ ; (vii)  $x, 1+y, z$
